# Supplementary material for: Maspin plays an essential role in early embryonic development
Source: Oxford University Press journal article supplement (doi:10.1242/dev.01048), 2004-03-02
Supplement: dev01048-sup-supptables.pdf [file dev01048-sup-supptables.pdf]

**Table S1. Genotype distribution of offsprings from heterozygous intercrosses**

| Number of matings | +/+ pups | +/- pups | -/- pups |
|-------------------|----------|----------|----------|
| 132               | 228      | 343      | 0        |

**Table S2. Ratio of blastocyst to two-cell embryos from the mating between  $Mp^{+/-}$  and  $Mp^{+/+}$  mice**

| Mating               | Number of pairs | Blastocyst/two-cell embryos (%) | Hatched blastocyst/two-cell embryos (%) |
|----------------------|-----------------|---------------------------------|-----------------------------------------|
| +/+ F $\times$ +/+ M | 3               | 74/81 (91.4%)                   | 68/81 (84.0%)                           |
| +/- M $\times$ +/- F | 4               | 97/106 (91.5%)*                 | 90/106 (84.9%) <sup>†</sup>             |

Statistical analysis was carried out by comparing the ratios between maspin heterozygous mating with that of wild-type mating.

\* $P > 0.425$ .

<sup>†</sup> $P > 0.297$ .
